# Supplementary material for: Antizyme Inhibitor 2-Deficient Mice Exhibit Altered Brain Polyamine Levels and Reduced Locomotor Activity
Source: MDPI journal article supplement (doi:10.3390/biom13010014), 2022-12-21
Supplement: s1 [file s1]

**Supplementary Table S1.** List of primers.

| Gene Name                             | Official Gene Symbol <sup>a</sup> | Forward (5'-3')              | Reverse (5'-3')            |
|---------------------------------------|-----------------------------------|------------------------------|----------------------------|
| Ornithine decarboxylase, structural 1 | <i>Odc1</i>                       | ATGGGTCCAGAGGCCAAA           | CTGCTTCATGAGTTGCCACA<br>TT |
| Ornithine decarboxylase antizyme 1    | <i>Oaz1</i>                       | GAGTTCGCAGAGGAGCAACT         | CCAAGAAAGCTGAAGGTT<br>G    |
| Ornithine decarboxylase antizyme 2    | <i>Oaz2</i>                       | AGTAAGTGTCCTCCAGCTCCA        | ATCTTCGACAGTGGGTGAG<br>G   |
| Antizyme inhibitor 1                  | <i>Azin1</i>                      | CTTCCACGAACCATCTGCT          | TTCCAGCATCTTGCATCTCA       |
| Antizyme inhibitor 2                  | <i>Azin2</i>                      | GCTTAGAGGGAGCCAAAAGTG        | CTCAGCAAGGATGTCCACA<br>C   |
| β-actin                               | <i>Actb</i>                       | GATTACTGCTCTGGCTCCTAGC<br>A  | GCTCAGGAGGAGCAATGAT<br>CTT |
| β-galactosidase                       | <i>LacZ</i>                       | TTATCGATGAGCGTGGTGTTA<br>TGC | GCACGATAGAGATTCGGGA<br>TTT |

<sup>a</sup> Mouse Genome Informatics Database.

**Supplementary Table S2.** Ornithine carboxylase activity during the postnatal period.

| Time (days) | mmol <sup>14</sup> CO <sub>2</sub> h <sup>-1</sup> g <sup>-1</sup><br>(mean ± SE) |
|-------------|-----------------------------------------------------------------------------------|
| 1           | 5.864 ± 0.635                                                                     |
| 2           | 4.583 ± 0.278                                                                     |
| 5           | 4.117 ± 0.316                                                                     |
| 7           | 2.235 ± 0.452                                                                     |
| 10          | 0.905 ± 0.123                                                                     |
| 20          | 0.070 ± 0.009                                                                     |
| 60          | 0.078 ± 0.012                                                                     |
